# Supplementary material for: Classification and Design of HIV-1 Integrase Inhibitors Based on Machine Learning
Source: Comput Math Methods Med. 2021 Apr 1;2021:5559338. doi: 10.1155/2021/5559338 (PMC8035010; doi:10.1155/2021/5559338)
Supplement: Supplementary Materials — Figure S1: the C values of decision trees based on molecular descriptors and molecular fingerprints in the (a) training set and (b) test set. Figure S2: the 16 dominant fingerprints obtained from decision tree with depth of 9. Figure S3: potentially disadvantageous molecular fingerprint structures for HIV-1 IN inhibitors derived from naive Bayesian classification. Figure S4: structural superimposition of quinolinone acid inhibitors in the training set. Figure S5: CoMFA and CoMSIA contour maps of quinolinone acid inhibitors: (a) steric field, (b) electrostatic field, (c) hydrophobic field, (d) H-bond donor field, and (e) H-bond acceptor field. Table S1: decision tree report with tree depth of 9. Table S2: effects of different parameter combinations in the test set and training sets on naive Bayesian classification. Table S3: statistical parameters of CoMFA and CoMSIA models. [file 5559338.f1.docx]

**Supporting Information:**

**Classification and Design of HIV-1 Integrase Inhibitors Based on Machine Learning**

Junlin Zhou a, †, Juan Hao a, †, Lianxin Peng a, †, Huaichuan Duana, Qing Luoa, Hailian Yan a, Hua Wan b, Yichen Hu a, Li Liang a, Zhenjian Xie a, Wei Liu a, *, Gang Zhao a, *, Jianping Hu a, *

*a Key Laboratory of Coarse Cereal Processing, Ministry of Agriculture and Rural Affairs, School of Pharmacy, Sichuan Industrial Institute of Antibiotics, Chengdu University, Chengdu 610106, China; b College of Mathematics and Informatics, South China Agricultural University, Guangzhou 510106, China*

* Address correspondence to this author at the School of Pharmacy, Chengdu University, Chengdu 610106, China; Tel/Fax: 028-84616301; E-mails: [liuweicdu@sina.com](mailto:liuweicdu@sina.com), [zhaogang@cdu.edu.cn](mailto:zhaogang@cdu.edu.cn) and hjpcdu[@163.com](mailto:@163.com)

† These authors contributed equally to this work.


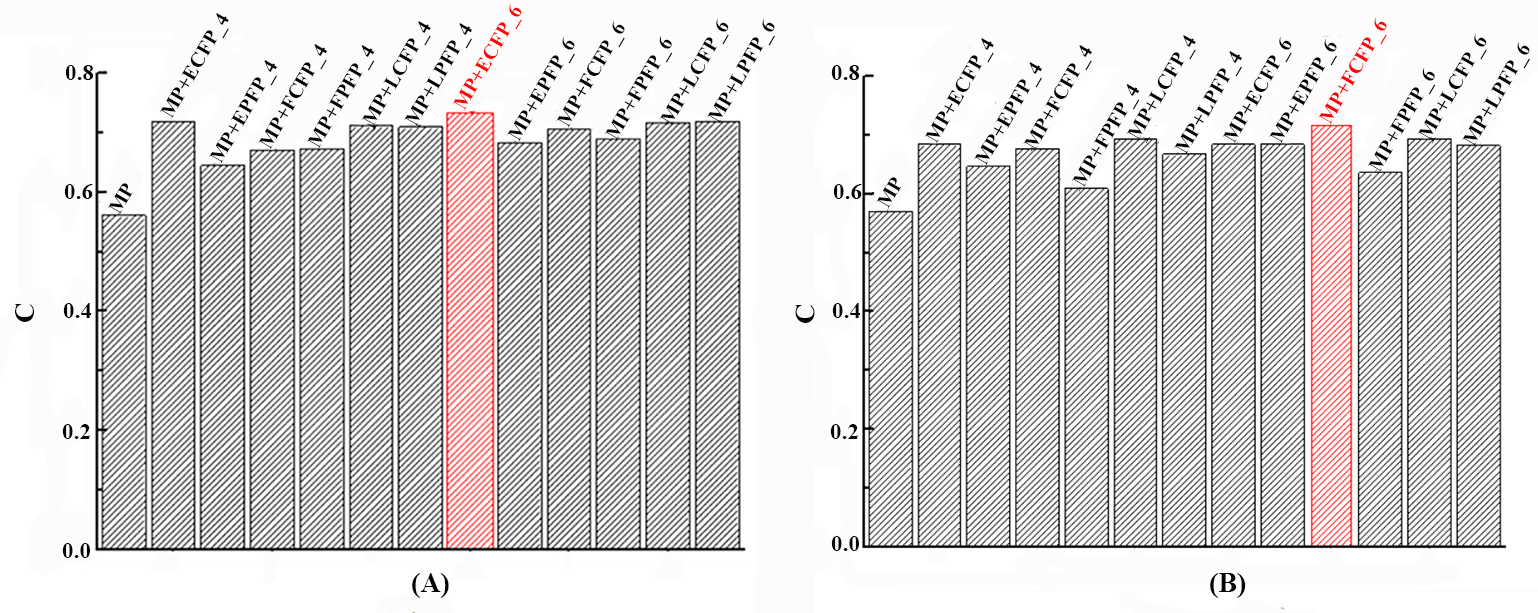


**Figure S1.** The C values of decision trees based on molecular descriptors and molecular fingerprints in the training set（A）and test set（B）


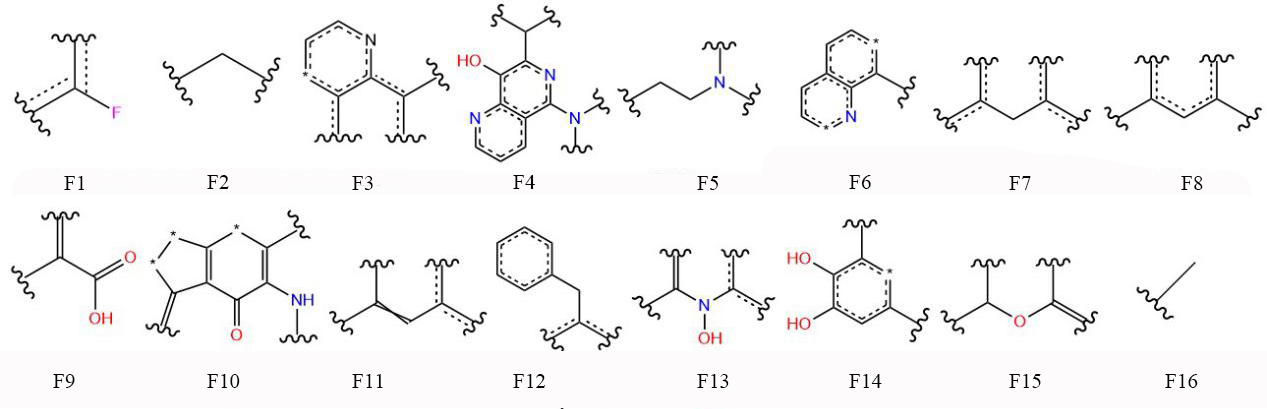


**Figure S2.** The 16 dominant fingerprints obtained from decision tree with depth of 9


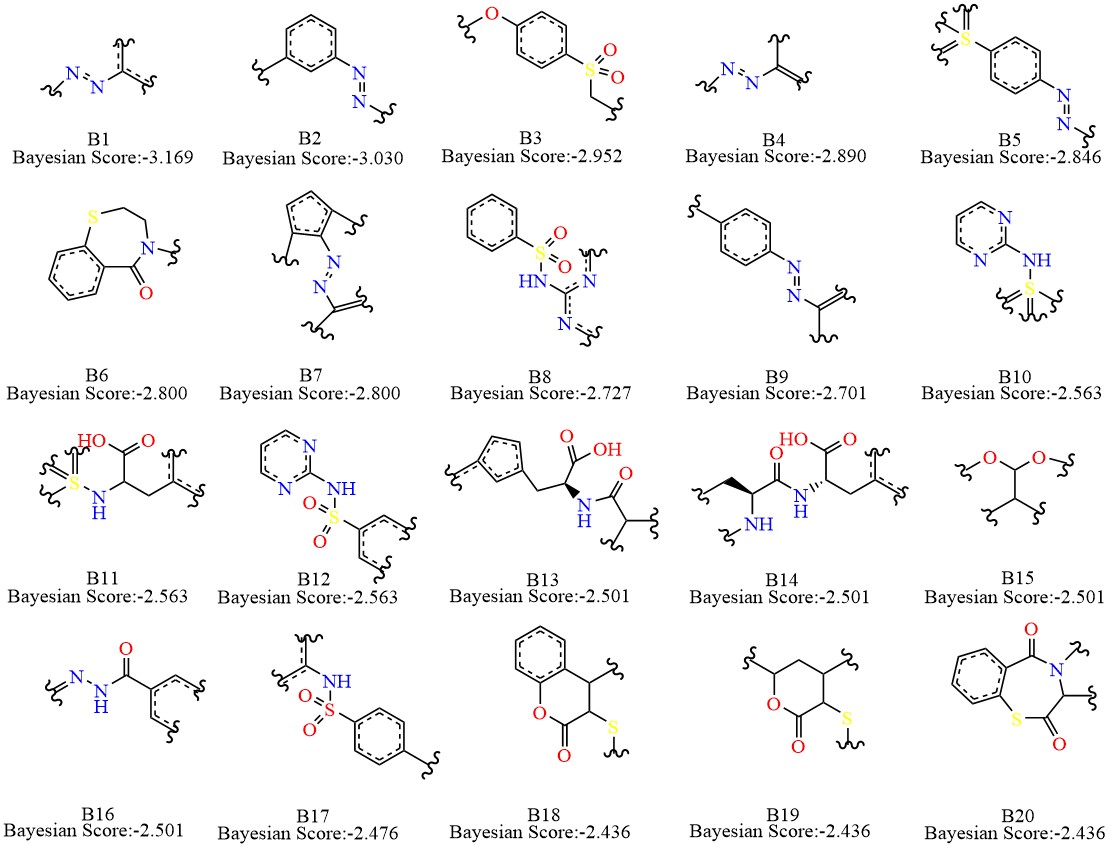


**Figure S3.** Potentially disadvantageous molecular fingerprint structures for HIV-1 IN inhibitors derived from naive Bayesian classification


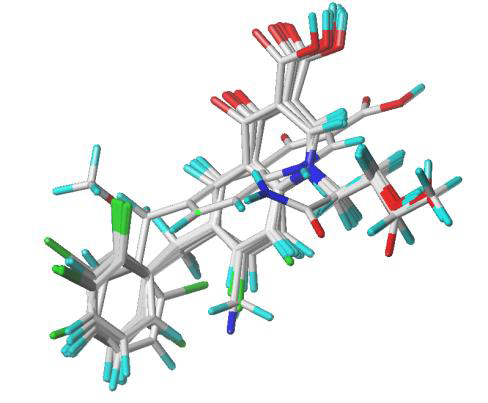


**Figure S4.** Structural superimposition of quinolinone acid inhibitors in the training set.


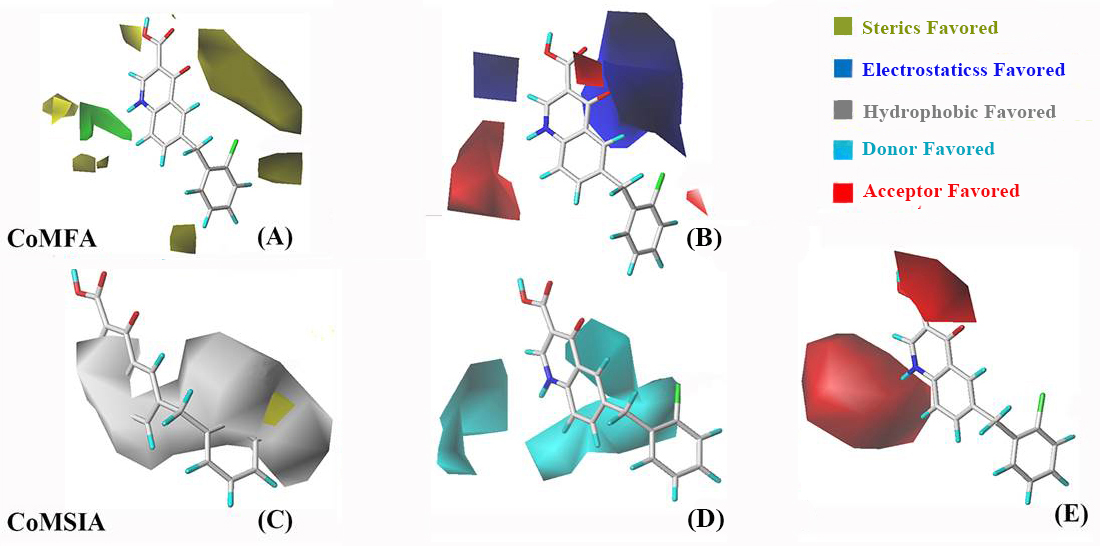


**Figure S5.** CoMFA and CoMSIA contour maps of quinolinone acid inhibitors:（A）Steric field, （B）Electrostatic field,（C）Hydrophobic field,（D）H-bond donor field,（E）H-bond acceptor field

**Table S1.** Decision tree report with tree depth of 9

| **Model information** | **Y axis properties** | **Mixed matrix** | **ROC score** | **Cross validation ROC score** |
| --- | --- | --- | --- | --- |
| tree:26 leaves  minimum value：0 | Class | |  | 1 | 0 | | --- | --- | --- | | 1 | 419 | 134 | | 0 | 89 | 843 | | 0.8578 | 0.8346 |

**Table S2.** Effects of different parameter combinations in the test set and training sets on naive Bayesian classification

| Descriptors | Test set | | | | | | | | | Training set | | | | | | | | |
| --- | --- | --- | --- | --- | --- | --- | --- | --- | --- | --- | --- | --- | --- | --- | --- | --- | --- | --- |
| TP | FN | FP | TN | SE | SP | Q+ | Q- | C | TP | FN | FP | TN | SE | SP | Q+ | Q- | C |
| MP | 78 | 51 | 37 | 134 | 0.605 | 0.784 | 0.678 | 0.724 | 0.570 | 370 | 183 | 262 | 670 | 0.669 | 0.719 | 0.585 | 0.785 | 0.561 |
| MP+ECFP4 | 98 | 31 | 26 | 145 | 0.760 | 0.848 | 0.790 | 0.824 | 0.684 | 467 | 86 | 152 | 780 | 0.844 | 0.837 | 0.754 | 0.901 | 0.718 |
| MP+EPFP4 | 86 | 43 | 21 | 150 | 0.667 | 0.877 | 0.804 | 0.777 | 0.647 | 423 | 130 | 190 | 742 | 0.765 | 0.796 | 0.690 | 0.851 | 0.645 |
| MP+FCFP4 | 94 | 35 | 23 | 148 | 0.729 | 0.865 | 0.803 | 0.809 | 0.677 | 475 | 78 | 217 | 715 | 0.859 | 0.767 | 0.686 | 0.902 | 0.670 |
| MP+FPFP4 | 88 | 41 | 36 | 135 | 0.682 | 0.789 | 0.710 | 0.767 | 0.609 | 390 | 163 | 111 | 851 | 0.705 | 0.885 | 0.778 | 0.839 | 0.673 |
| MP+LCFP4 | 88 | 41 | 11 | 160 | 0.682 | 0.936 | 0.889 | 0.796 | 0.694 | 481 | 72 | 176 | 756 | 0.870 | 0.811 | 0.732 | 0.913 | 0.711 |
| MP+LPFP4 | 91 | 38 | 22 | 149 | 0.705 | 0.871 | 0.805 | 0.797 | 0.667 | 478 | 75 | 174 | 758 | 0.864 | 0.813 | 0.733 | 0.910 | 0.709 |
| MP+ECFP6 | 97 | 32 | 25 | 146 | 0.752 | 0.854 | 0.795 | 0.820 | 0.684 | 469 | 84 | 138 | 794 | 0.848 | 0.852 | 0.773 | 0.904 | 0.733 |
| MP+EPFP6 | 97 | 32 | 25 | 146 | 0.752 | 0.854 | 0.795 | 0.820 | 0.684 | 431 | 122 | 150 | 782 | 0.779 | 0.839 | 0.742 | 0.865 | 0.683 |
| MP+FCFP6 | 98 | 31 | 18 | 153 | 0.760 | 0.895 | 0.845 | 0.832 | 0.717 | 480 | 73 | 180 | 752 | 0.868 | 0.807 | 0.727 | 0.912 | 0.706 |
| MP+FPFP6 | 95 | 34 | 36 | 135 | 0.736 | 0.789 | 0.725 | 0.799 | 0.636 | 434 | 119 | 146 | 786 | 0.785 | 0.843 | 0.748 | 0.869 | 0.689 |
| MP+LCFP6 | 99 | 30 | 25 | 146 | 0.767 | 0.854 | 0.798 | 0.830 | 0.693 | 488 | 65 | 178 | 754 | 0.882 | 0.809 | 0.733 | 0.921 | 0.716 |
| MP+LPFP6 | 91 | 38 | 18 | 153 | 0.705 | 0.895 | 0.835 | 0.801 | 0.682 | 471 | 82 | 156 | 776 | 0.852 | 0.833 | 0.751 | 0.904 | 0.718 |

**Table S3.** Statistical parameters of CoMFA and CoMSIA models

| **Models** | **PLS statistics** | | | | | | | | |  | **Contributions** | | | | |
| --- | --- | --- | --- | --- | --- | --- | --- | --- | --- | --- | --- | --- | --- | --- | --- |
| *ONCa* | | *q*2 b | *E*sc | *r*2d | *F*e | RMSEf | *P*g | *r*2ph |  | *S*i | *E*j | *H*k | *D*l | *A*m |
| **CoMFA** | 3 | 0.864 | | 0.104 | 0.969 | 145.234 | 0.020 | 0.000 | 0.918 |  | 0.686 | 0.314 | **-** | **-** | **-** |
| **CoMSIA** | 2 | 0.908 | | 0.110 | 0.963 | 195.530 | 0.016 | 0.000 | 0.933 |  | 0.074 | 0.132 | 0.169 | 0.457 | 0.168 |

aOptimum number of components, bLeave-one-out (LOO) cross-validated correlation coeﬃcient, cStandard error of estimate, dNon-cross-validated correlation coeﬃcient, eF-Test value, fRoot mean squared error (RMSE), gProbability of r2, hPredicted correlation coeﬃcient for the test set, iSteric ﬁeld, jElectrostatic ﬁeld, kHydrophobic ﬁeld, lH-bond donor ﬁeld, mH-bond acceptor ﬁeld.
